# Supplementary material for: Toll-like receptor 2 promiscuity is responsible for the immunostimulatory activity of nucleic acid nanocarriers
Source: PubMed Central journal article supplement (PMC5312493; doi:10.1016/j.jconrel.2016.12.029), 2017-02-10
Supplement: mmc1.pdf [file mmc1.pdf]

# Toll-like receptor 2 promiscuity is responsible for the immunostimulatory activity of nucleic acid nanocarriers

Malvina Pizzuto, Monique Gangloff, Daniel Scherman, Nicholas J. Gay, Virginie Escriou, Jean-Marie Ruyschaert<sup>1</sup> and Caroline Lonez

**Supplemental Figures S1-S9. Docking poses of lipopolyamines bound to TLR2.** Representations generated by LigPlot+ software.

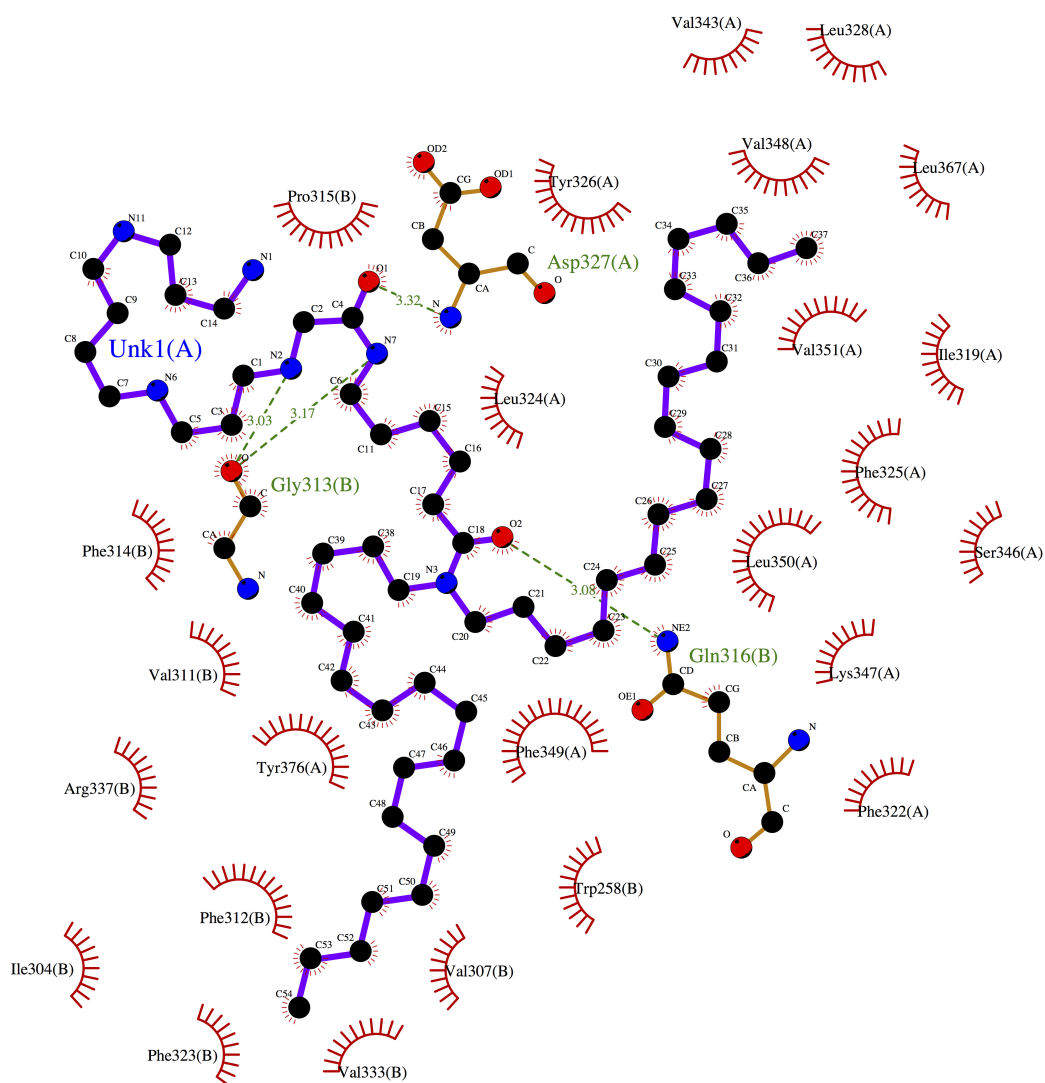



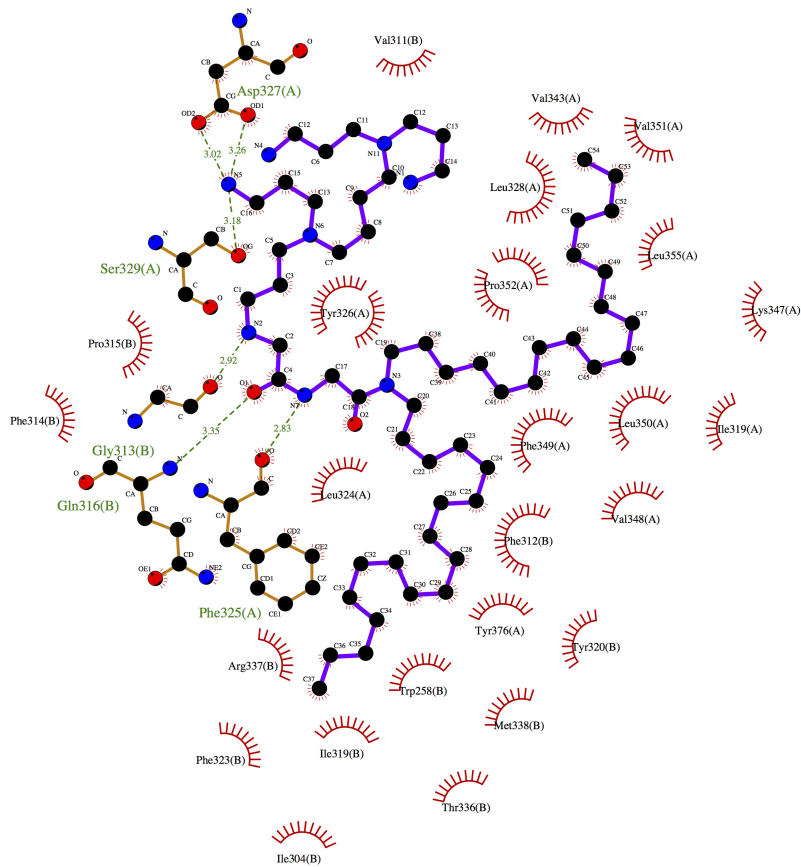

**Figure S3.** RPR 120525 docking to TLR2/TLR1 with one chain in each TLR. The binding energy of this complex is -32.5 kcal/mol.

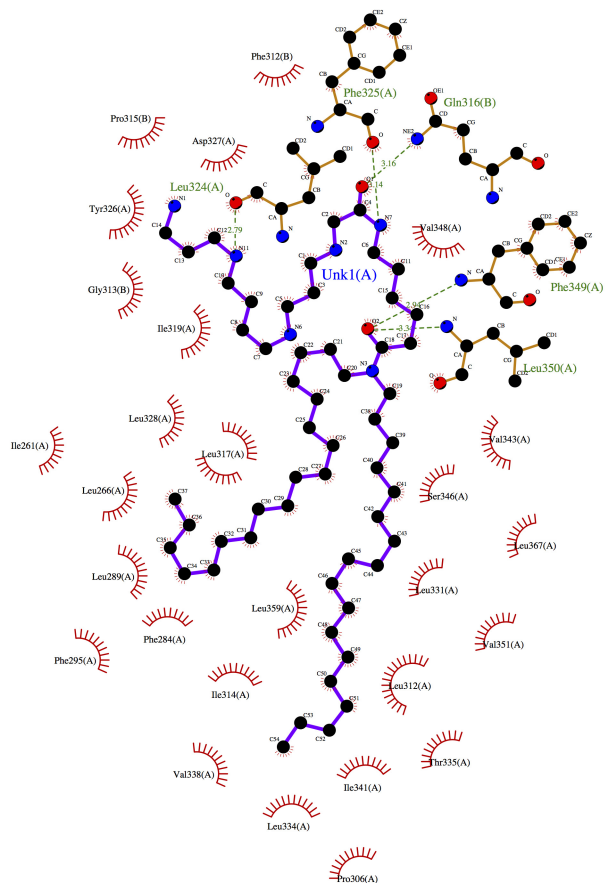

**Figure S4.** RPR 128506 docking to TLR2/TLR1 with both chains in TLR2. The binding energy of this complex is -31.9 kcal/mol.

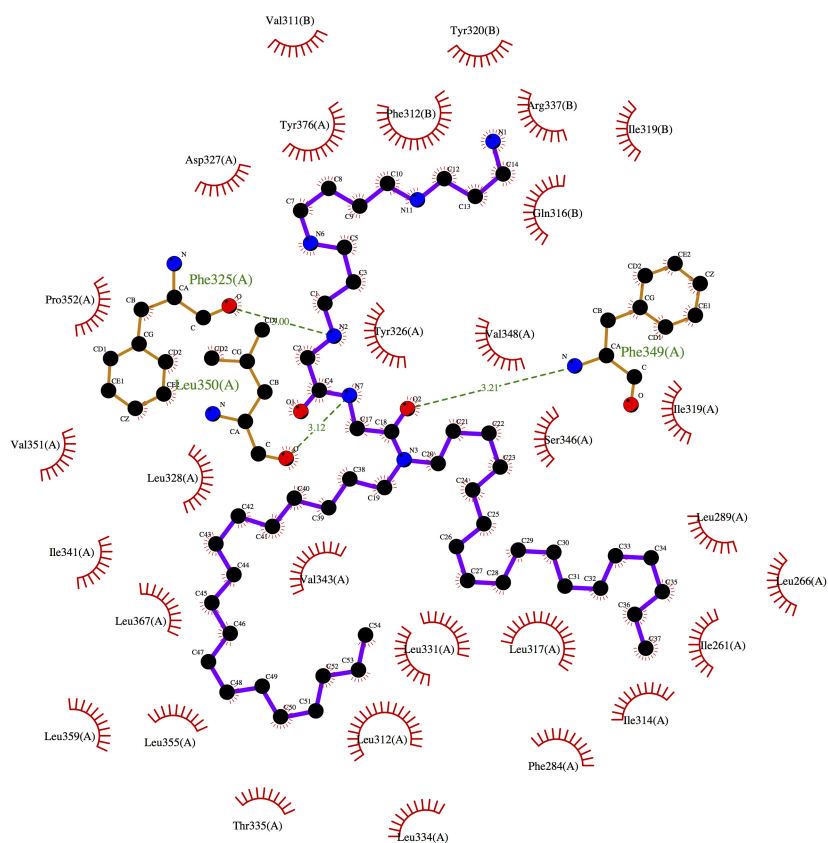

**Figure S5.** RPR 120535 docking to TLR2/TLR1 with both chains in TLR2. The binding energy of this complex is -31.1 kcal/mol). A hydrogen bond to TLR1 Gln316' that was found using Chimera is not depicted by LigPlot+.

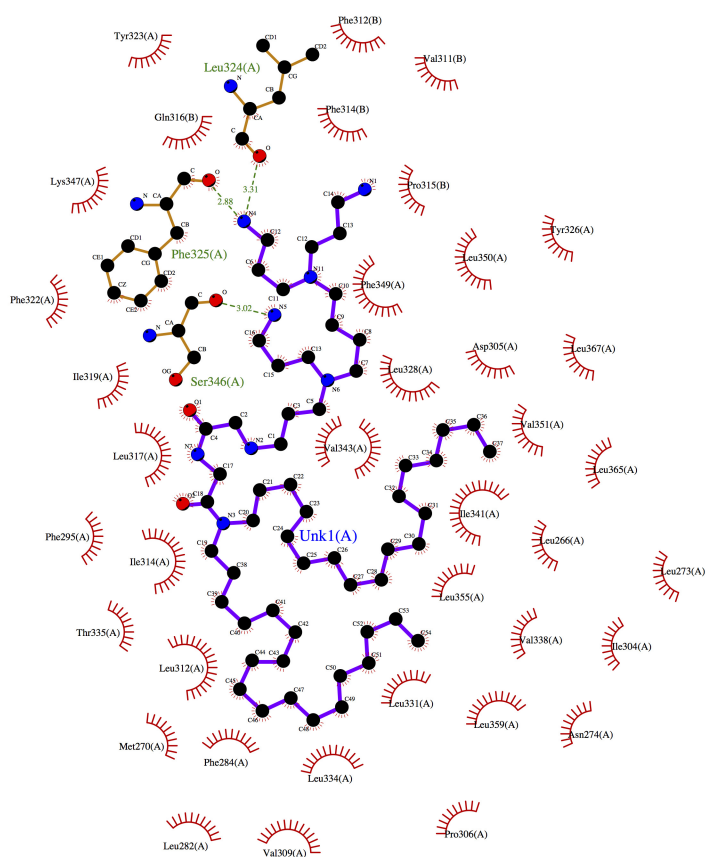

**Figure S6.** RPR 120525 docking to TLR2/TLR1 with both chains in TLR2. The binding energy of this complex is -32.1 kcal/mol.

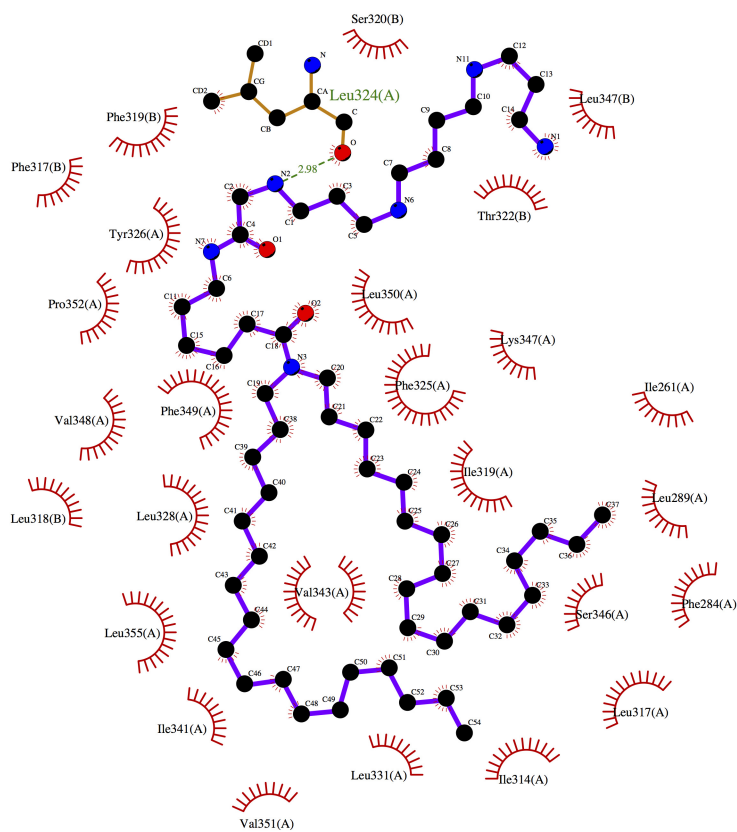

**Figure S7. RPR 128506 docking to TLR2/TLR6.** The binding energy of this complex is -29.9 kcal/mol. Additional hydrogen bonds to TLR2 Tyr326 and TLR6 Ser320", Thr322" and Tyr 323" were found using Chimera but is not depicted by LigPlot+.

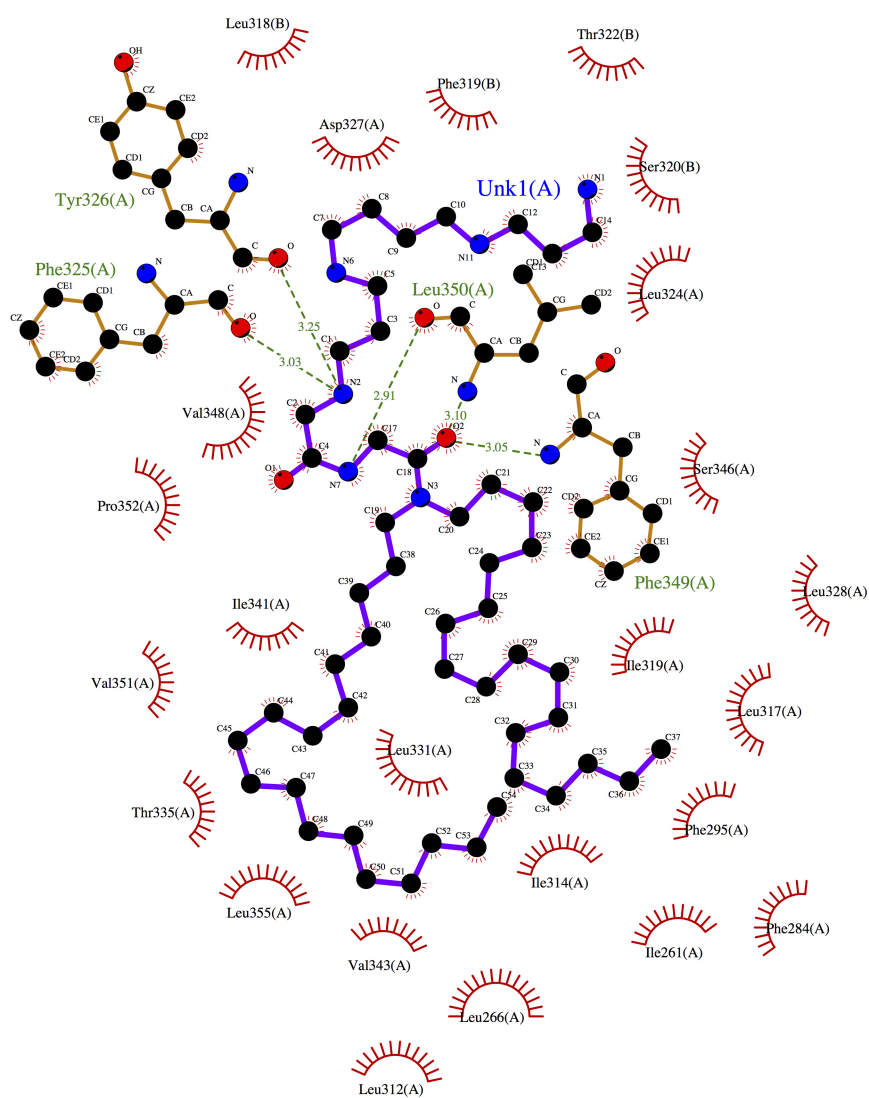

**Figure S8.** RPR 120535 docking to TLR2/TLR6. The binding energy of this complex is -28.5 kcal/mol. An additional polar contact with TLR6 Ser320 was found using Chimera (right panel) but is not depicted by LigPlot+ (left panel).



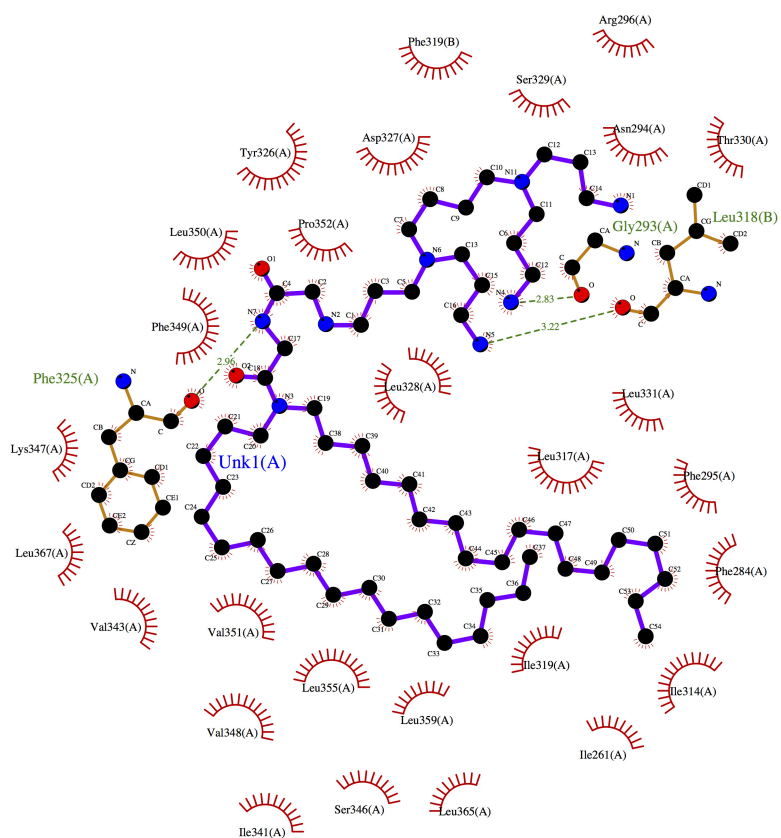

**Figure S9.** RPR 120525 docking to TLR2/TLR6. The binding energy of this complex is -31.7 kcal/mol.

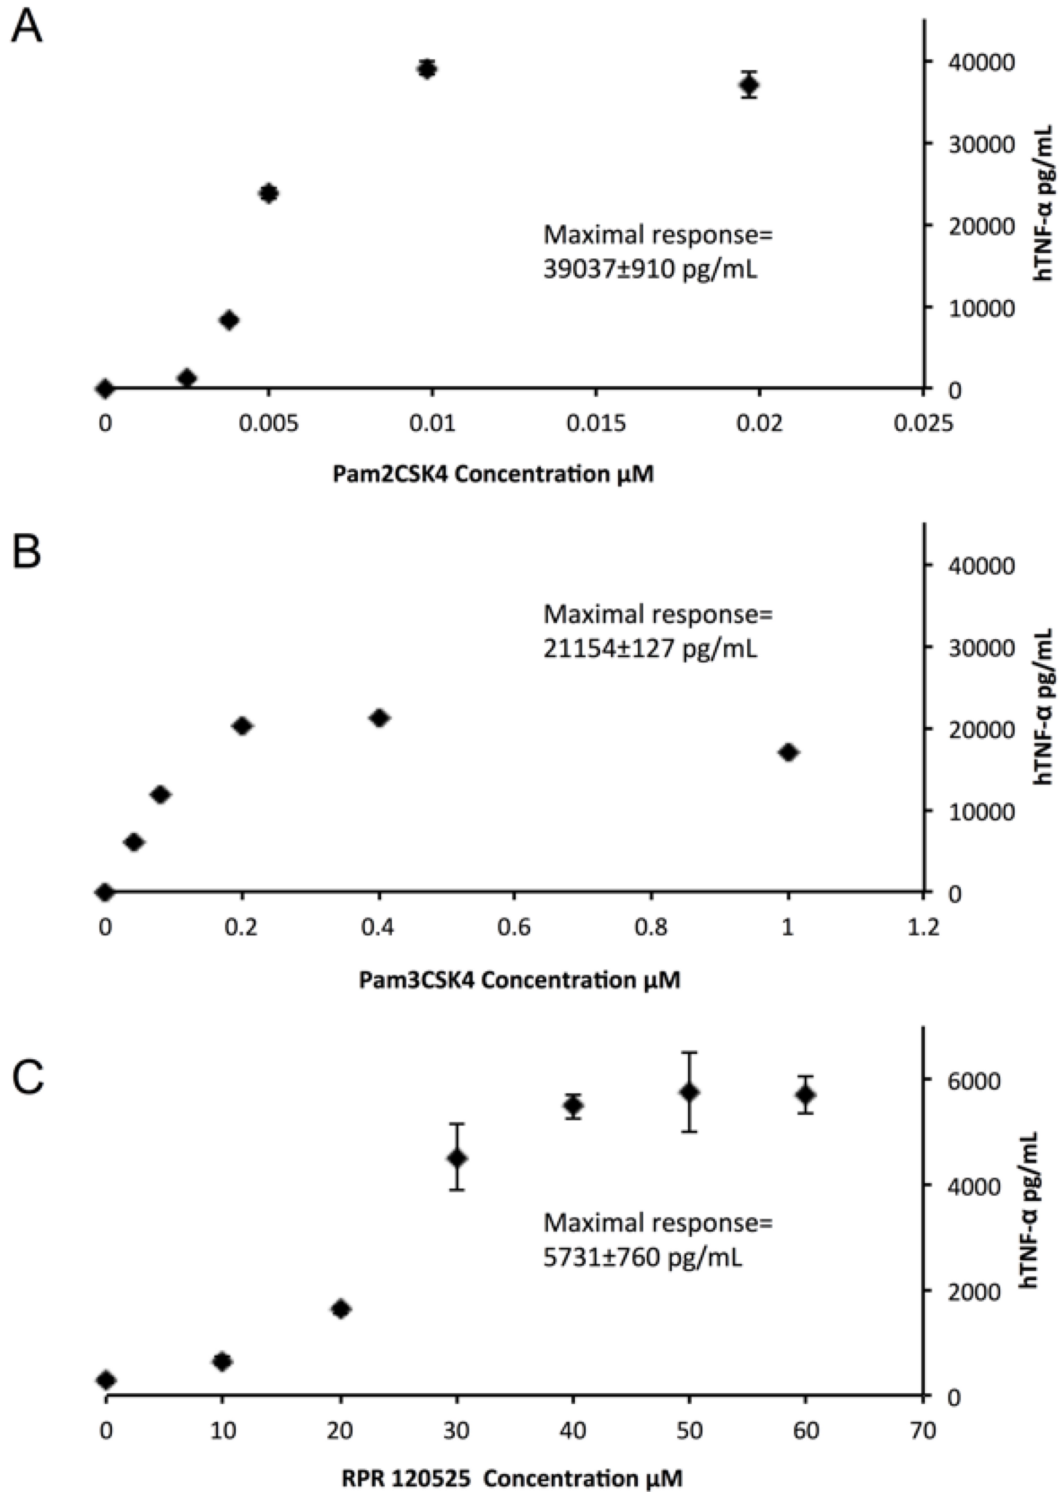

**Supplemental Figure S10: RPR 120525 is a weaker agonist than lipopeptides.** Primed THP1 cells were incubated for 5h with serum free medium alone (control) or with the indicated amount of (A) Pam<sub>2</sub>CSK<sub>4</sub>, (B) Pam<sub>3</sub>CSK<sub>4</sub> or (C) RPR 120525 cationic lipids in serum free medium, then cell supernatants were collected and TNF-α was quantified using ELISA assay following manufacturer's instructions. Each point represents the mean ± standard deviation of three replicate values (n=3). The experiment is representative of at least 3 replicates.

A

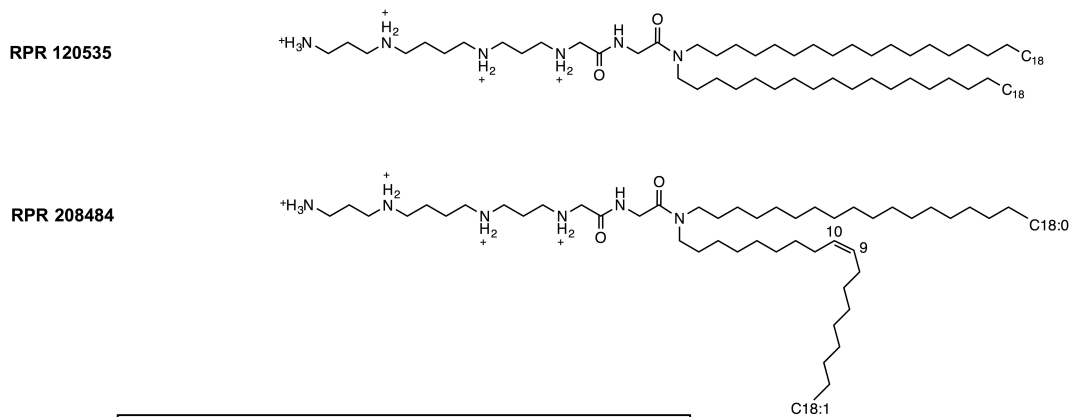

B

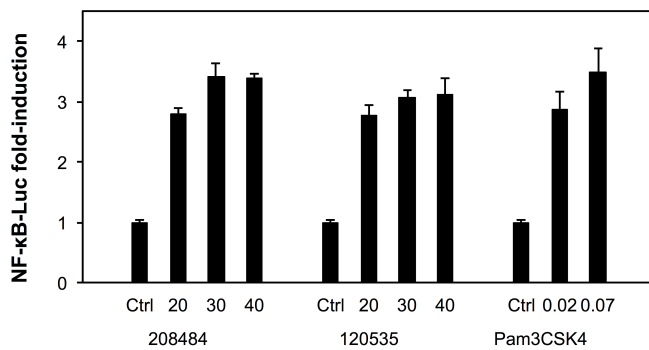

**Supplemental Figure S11. RPR 208484 with a single unsaturated alkene chain 18:1 ( $\Delta^9$ -Cis) signals as strongly as its saturated counterpart RPR 120535 and TLR2/TLR1 ligand Pam<sub>3</sub>CSK<sub>4</sub>.** Raw-blue cells were incubated for 5h with serum free medium alone (C) or with the indicate amount of cationic lipids in  $\mu$ M in serum free medium, then cell supernatants were retired and replaced with complete medium. Supernatants were collected after further 17h of incubation and the NF- $\kappa$ B activation was quantified using Quanti-blue assay following manufacturer's instructions. Each bar represents the mean + standard deviation of three replicate values (n=3). The experiment is representative of at least 3 replicates.

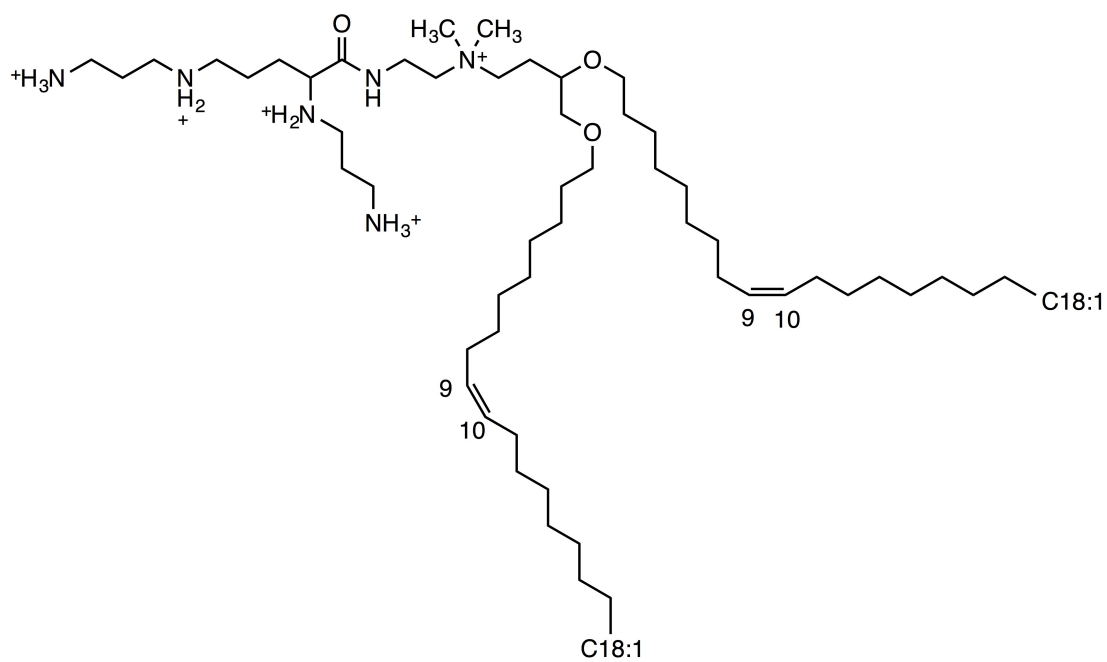

**Supplemental Figure S12. Chemical structure of lipofectamine transfection reagent component DOSPA.**
